# Supplementary material for: A Dendritic Cell-Activating Rv1876 Protein Elicits Mycobacterium Bovis BCG-Prime Effect via Th1-Immune Response
Source: MDPI journal article supplement (doi:10.3390/biom11091306), 2021-09-03
Supplement: s1 [file s1]

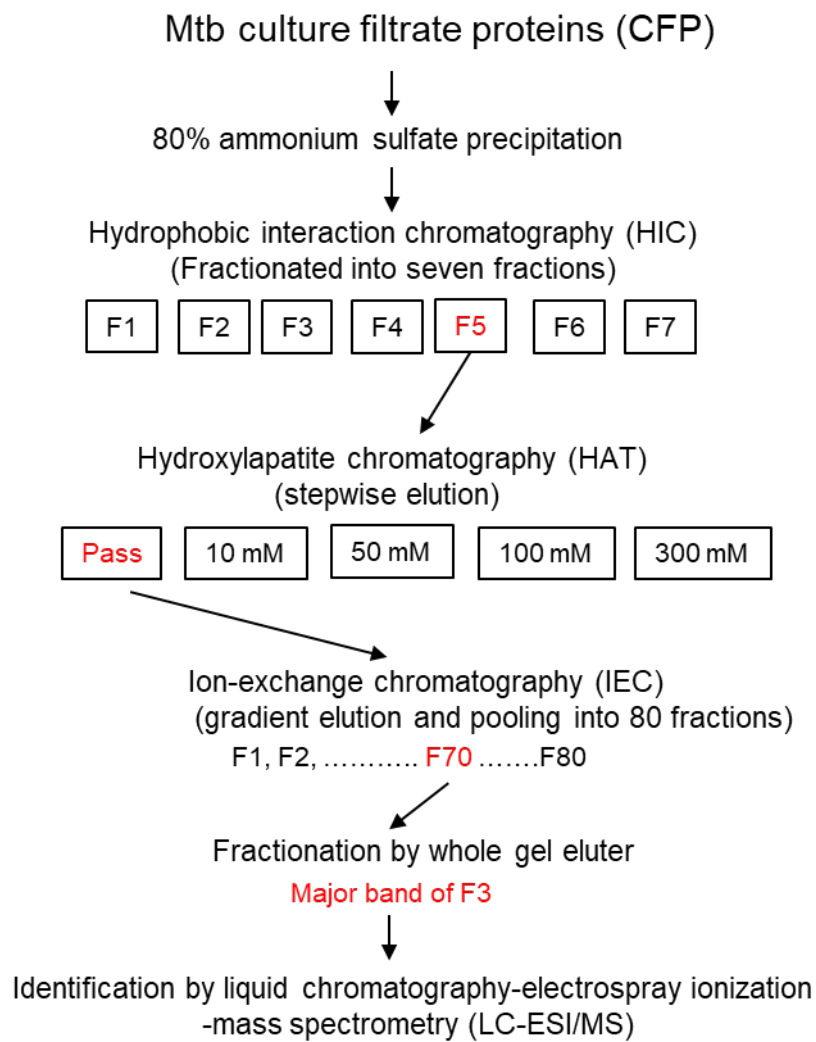

**Supplementary Figure S1.** Procedure of Multi-dimensional fractionation of Mtb CFP.

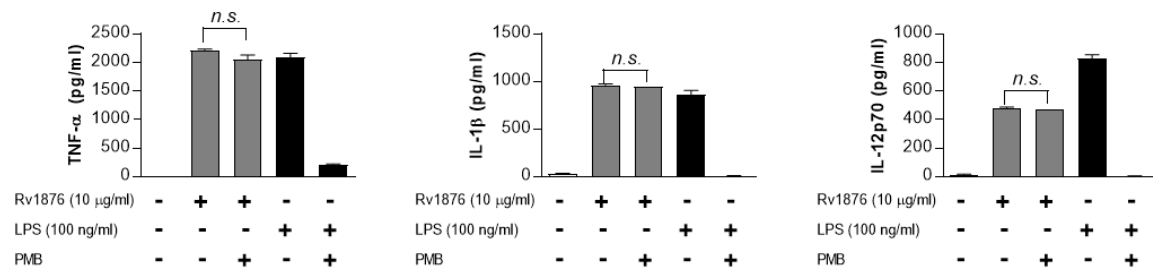

**Supplementary Figure S2.** Confirmation of endotoxin decontamination of the purified Rv1876. DCs were pretreated with polymyxin B (20  $\mu$ g/mL) for 1 h prior to stimulation of Rv1876 (10  $\mu$ g/mL). LPS (100 ng/mL) was used as control. After 24 h, the quantities of TNF- $\alpha$ , IL-1 $\beta$ , and IL-12p70 in the culture medium were measured by ELISAs. All data are expressed as mean  $\pm$  SD (n = 3) and treatments that showed no significant effect are indicated as *n.s.*

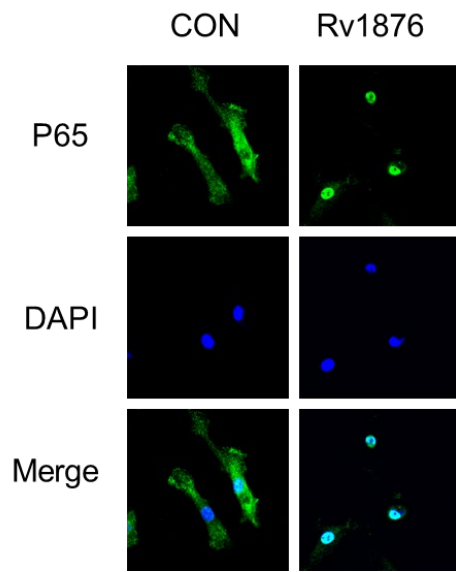

**Supplementary Figure S3.** Rv1876 enhances p65 nuclear translocation on BMDCs. The BMDC cells on coverslips were treated with Rv1876 for 45 min. Immunoreactivity of the p65 subunit of NF- $\kappa$ B was determined by immunofluorescence, as described in the Materials and Methods.

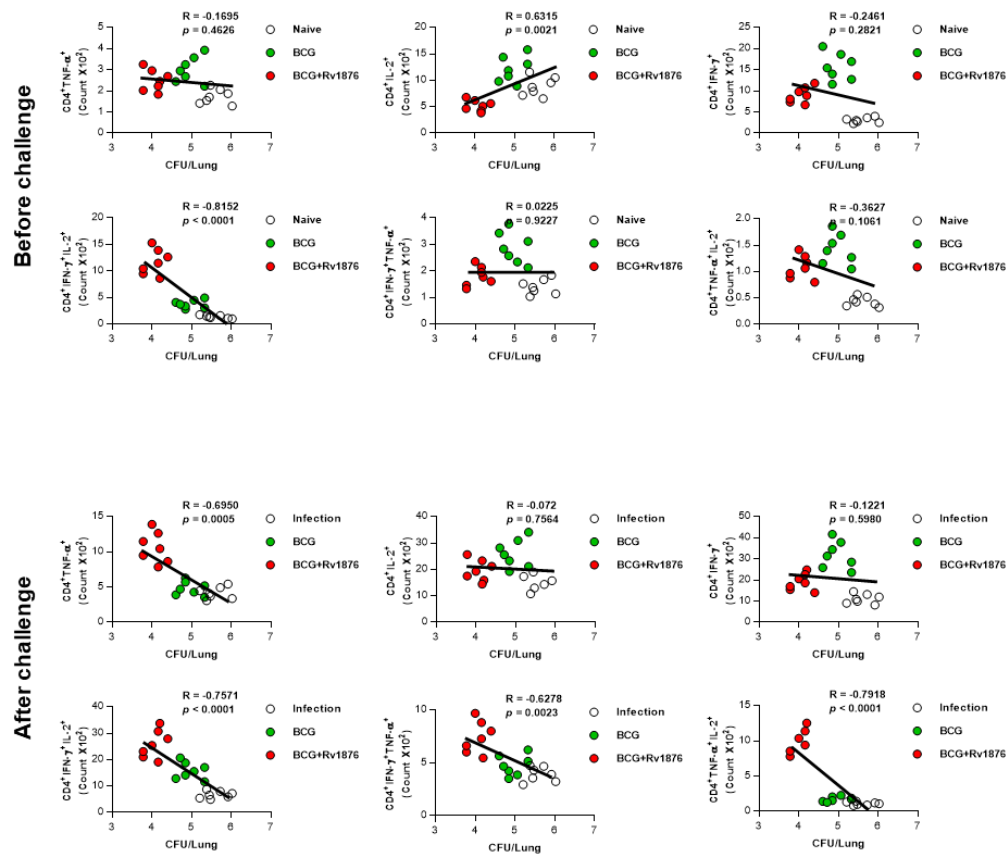

**Supplementary Figure S4.** Analysis of protective correlations for protection level with vaccine-induced immune responses before- and after-challenge. Relationship between protection (CFU) and Rv1876 specific various cytokine combination in  $CD4^+CD44^+$  T cells is shown as a fitted regression line with the correlation coefficient. Spearman's  $r$  and  $P$  values of the correlations are indicated. White circle: Naïve or Infection, green circle: BCG, and red circle: BCG+Rv1876.
