# Supplementary material for: A Dendritic Cell-Activating Rv1876 Protein Elicits Mycobacterium Bovis BCG-Prime Effect via Th1-Immune Response
Source: Biomolecules. 2021 Sep 3;11(9):1306. doi: 10.3390/biom11091306 (PMC8465531; doi:10.3390/biom11091306)
Supplement: Supplementary file 1 [file biomolecules-11-01306-s001.zip › Revised Table 1_biomolecules_1319244.xlsx]

## Sheet: Sheet1
	Name	Supplier	Catalog No.
	Recombinant mouse macrophage colony-stimulating factor (M-CSF)	Peprotech	MMCS-25
	Recombinant mouse granulocyte-macrophage colony stimulating factor (GM-CSF)	JW CreaGene	MGM-25
	Recombinant mouse interleukin 4 (IL-4)	JW CreaGene	MI4-10
	Fluorescein isothiocyanate (FITC)-annexin V/propidium iodide kit	BD bioscience	556547
	Lipopolysaccharide (LPS) from Escherichia coli O111:B4	InvivoGen	vac-3pelps
	OT-II peptide (OVA323–339)	InvivoGen	vac-isq
	CellTrace™ CFSE	invitrogen	C34570
	6x-His Tag Monoclonal Antibody	abcam	ab18184
	anti-phosphorylated-ERK1/2 monoclonal Ab	Cell signaling	4370
	anti-phosphorylated JNK monoclonal Ab	Cell signaling	4668
	anti-phosphorylated p38 monoclonal Ab	Cell signaling	4511
	anti-phosphorylated IκB-α monoclonal Ab	Cell signaling	9246
	anti-IκB-α monoclonal Ab	Cell signaling	4812
	anti-β-actin polyclonal Ab	Cell signaling	4967
	Goat Anti-Mouse IgG, H&L Chain Specific Peroxidase Conjugate	Merck	401215
	Goat Anti-Rabbit IgG, H & L Chain Specific Peroxidase Conjugate	Merck	401353
	CD11c Monoclonal Antibody (N418), FITC	Thermo Fisher	11-0114-82
	BV605 Rat Anti-Mouse CD4	BD bioscience	563151
	Rat Anti-Mouse IL-2	BD bioscience	554429
	Hamster Anti-Rat/Mouse TNF-α	BD bioscience	559503
	Alexa Fluor® 488 Rat Anti-Mouse IFN-γ	BD bioscience	557724
	FITC Rat Anti-Mouse CD62L	BD bioscience	553150
	PE Rat Anti-Mouse CD44	BD bioscience	553134
	CD40 Monoclonal Antibody (1C10)	Thermo Fisher	12-0401-81
	CD80 (B7-1) Monoclonal Antibody (16-10A1)	Thermo Fisher	12-0801-82
	CD86 (B7-2) Monoclonal Antibody (GL1)	Thermo Fisher	12-0862-83
	MHC Class II (I-A/I-E) Rat anti-Mouse	Thermo Fisher	12-5321-83
	NFκB p65 Antibody	santacruz	sc-372
	Goat anti-Rabbit IgG (H+L) Cross-Adsorbed Secondary Antibody, Alexa Fluor 488	Thermo Fisher	A-11008
	Mouse IFN gamma Uncoated ELISA	invitrogen	88-7314
	Mouse IL-2 Uncoated ELISA	invitrogen	88-7024
	Mouse IL-4 Uncoated ELISA	invitrogen	88-7044
	APC-eFluor 780 CD4 Monoclonal Antibody (RM4-5)	invitrogen	47-0042-82
